# Supplementary material for: The centrosomal protein 83 (CEP83) regulates human pluripotent stem cell differentiation toward the kidney lineage
Source: eLife. 2022 Oct 12;11:e80165. doi: 10.7554/eLife.80165 (PMC9629839; doi:10.7554/eLife.80165)
Supplement: Figure 1—source data 2. [file elife-80165-fig1-data2.xlsx]

## Sheet: Sheet1
	GAPDH			gene of interest (CEP83)
	CT1	CT2	CT mean	CT1	CT2	CT mean	dct	ddCT	2^(-ddCt)	ttest (P- value)
WT1	16.3656	16.3801	16.3729	26.5606	26.7505	26.6556	10.2827	0.240673	0.84635	0.0200645	Sig.
WT2	15.7718	15.6811	15.7265	24.8457	25.2803	25.063	9.33656	-0.705506	1.63072
WT3	16.0787	16.0927	16.0857	26.3633	26.8219	26.5926	10.5069	0.464833	0.724555
KO1	15.3852	15.8418	15.6135	34.3517	34.6136	34.4827	18.8692	8.8271	0.00220179
KO2	16.3815	16.364	16.3728	34.0922	34.2017	34.147	17.7742	7.73209	0.00470336
KO3	15.3707	16.4766	15.9237	31.8532	34.7794	33.3163	17.3927	7.3506	0.00612701
						Aveg.dct (WT)	10.0421
