# Supplementary material for: The centrosomal protein 83 (CEP83) regulates human pluripotent stem cell differentiation toward the kidney lineage
Source: eLife. 2022 Oct 12;11:e80165. doi: 10.7554/eLife.80165 (PMC9629839; doi:10.7554/eLife.80165)
Supplement: Figure 3—source data 1. [file elife-80165-fig3-data1.xlsx]

## Sheet: Sheet1
			Percent of nephron formation per organoid				Summary of ttest in GraphPad Prism
			organoid number	WT organoids	KO organoids		How big is the difference?
			1	70	0		Mean ± SEM of column A (WT)	66.31 ± 3.441, n=13
			2	75	0		Mean ± SEM of column B (KO)	0 ± 0, n=9
			3	55	0		Difference between means	-66.31 ± 4.167
			4	65	0		95% confidence interval	-75 to -57.62
			5	80	0		R squared (eta squared)	0.9268
			6	75	0
			7	40	0		F test to compare variances
			8	45	0		F, DFn, Dfd	Infinity, 12, 8
			9	75	0		P value	<0.0001
			10	70			P value summary	****
			11	65			Significantly different (P < 0.05)?	Yes
			12	77
			13	70
