# Supplementary material for: The centrosomal protein 83 (CEP83) regulates human pluripotent stem cell differentiation toward the kidney lineage
Source: eLife. 2022 Oct 12;11:e80165. doi: 10.7554/eLife.80165 (PMC9629839; doi:10.7554/eLife.80165)
Supplement: Figure 3—source data 2. [file elife-80165-fig3-data2.xlsx]

## Sheet: Sheet1
Figure 3- source data 2 (Fig. 3L-H)
Plotted data= TPM values
statistical test: ttest betweewn 3 WT and 3KO per each time point, P- value was calculated on log TPM values.
1- NPHS1
TPM values	WT			CEP83-/-			log TPM	WT			CEP83-/-
	WT1	WT2	WT3	KO1	KO2	KO3		WT1	WT2	WT3	KO1	KO2	KO3		P- value
Day 0	1.30551	1.78227	1.8224	1.02047	1.3389	0.717977		0.115781	0.250974	0.260645	0.00879982	0.126749	-0.143889		0.080894	not sig.
Day 7	0.087016	0.099118	0.114861	0.104125	0.051506	0.062691		-1.0604	-1.00385	-0.939827	-0.982445	-1.28814	-1.20279		0.183891	not sig.
Day 25	97.1776	215.777	199.792	0.12592	0.251184	0.067264		1.98757	2.33401	2.30058	-0.899905	-0.600008	-1.17222		9.87867e-05	Sig.
2- LRP2
TPM values	WT			CEP83-/-			log TPM	WT			CEP83-/-
	WT1	WT2	WT3	KO1	KO2	KO3		WT1	WT2	WT3	KO1	KO2	KO3		P- value
Day 0	0.292977	0.21167	0.235647	0.132081	0.464213	0.370092		-0.533166	-0.674341	-0.627738	-0.87916	-0.333283	-0.43169		0.731411	not sig.
Day 7	0.857719	0.665315	0.776457	0.335683	0.441871	0.389344		-0.066655	-0.176973	-0.109883	-0.474071	-0.354705	-0.409667		0.00332013	Sig.
Day 25	4.12026	2.46887	2.8241	0.01498	0.046228	0.045494		0.614925	0.392499	0.45088	-1.82449	-1.33509	-1.34205		0.000344338	Sig.
3- HNF1B	WT			CEP83-/-			log TPM	WT			CEP83-/-
TPM values	WT1	WT2	WT3	KO1	KO2	KO3		WT1	WT2	WT3	KO1	KO2	KO3		P- value
Day 0	0.040815	0.001	0.001	0.020861	0.001	0.044766		-1.38918	-3	-3	-1.68066	-3	-1.34905		0.571687	not sig.
Day 7	0.250402	0.13576	0.179723	0.032475	0.093491	0.057486		-0.601362	-0.867228	-0.745396	-1.48845	-1.02923	-1.24044		0.0283967	Sig.
Day 25	16.3063	31.9286	33.9345	0.001	0.018621	0.001		1.21236	1.50418	1.53064	-3	-1.73	-3		0.000785709	Sig.
4- PAX2	WT			CEP83-/-			log TPM	WT			CEP83-/-
TPM values	WT1	WT2	WT3	KO1	KO2	KO3		WT1	WT2	WT3	KO1	KO2	KO3		P- value
Day 0	0.001	0.0364	0.038039	0.019967	0.037559	0.084592		-3	-1.4389	-1.41977	-1.69969	-1.42529	-1.07267		0.374262	not sig.
Day 7	21.7127	21.4214	21.3073	24.2579	23.3194	17.2361		1.33671	1.33085	1.32853	1.38485	1.36772	1.23644		0.962315	not sig.
Day 25	13.7817	181.134	164.719	0.001	0.219766	0.329339		1.1393	2.258	2.21674	-3	-0.658039	-0.482357		0.0217328	Sig.
5- PAX8	WT			CEP83-/-			log TPM	WT			CEP83-/-
TPM values	WT1	WT2	WT3	KO1	KO2	KO3		WT1	WT2	WT3	KO1	KO2	KO3		P- value
Day 0	0.001	0.001	0.047872	0.001	0.987974	1.2704		-3	-3	-1.31992	-3	-0.00525448	0.103939		0.27336	not sig.
Day 7	0.223089	0.109573	0.75696	0.406736	0.168664	0.04651		-0.651522	-0.960296	-0.120927	-0.390687	-0.772978	-1.33245		0.526498	not sig.
Day 25	20.1003	168.446	160.134	0.031718	0.015197	0.180237		1.3032	2.22646	2.20448	-1.49869	-1.81824	-0.744156		0.00176542	Sig.
