# Supplementary material for: The centrosomal protein 83 (CEP83) regulates human pluripotent stem cell differentiation toward the kidney lineage
Source: eLife. 2022 Oct 12;11:e80165. doi: 10.7554/eLife.80165 (PMC9629839; doi:10.7554/eLife.80165)
Supplement: Figure 7—source data 1. [file elife-80165-fig7-data1.xlsx]

## Sheet: Sheet1
1- ISL1
	WT			CEP83-/-			log TPM	WT			CEP83-/-				P- value
TPM values	WT1	WT2	WT3	KO1	KO2	KO3		WT1	WT2	WT3	KO1	KO2	KO3
Day 0	0.042183	0.001	0.041117	0.001	0.040597	0.136808		-1.37486	-3	-1.38598	-3	-1.39151	-0.863889		0.850667	not sig.
Day 7	6.13796	6.47483	4.46849	7.261	10.1418	13.4391		0.788024	0.811229	0.650161	0.860996	1.00611	1.12837		0.0542309	not sig.
Day 25	9.54683	0.882236	1.08225	11.7531	42.2137	28.3673		0.979859	-0.0544152	0.0343284	1.07015	1.62545	1.45282		0.0451345	Sig.
2- TBX1
	WT			CEP83-/-			log TPM	WT			CEP83-/-				P- value
TPM values	WT1	WT2	WT3	KO1	KO2	KO3		WT1	WT2	WT3	KO1	KO2	KO3
Day 0	17.0418	15.3104	12.7899	10.6844	14.5368	15.7079		1.23152	1.18499	1.10687	1.02875	1.16247	1.19612		0.509776	not sig.
Day 7	63.4614	61.1689	68.4825	95.0594	68.6985	78.4086		1.80251	1.78653	1.83558	1.97799	1.83695	1.89436		0.094178	not sig.
Day 25	26.9923	3.44169	3.2484	70.4173	62.0674	69.7205		1.43124	0.536771	0.51167	1.84768	1.79286	1.84336		0.0297755	Sig.
3- SOX7
	WT			CEP83-/-			log TPM	WT			CEP83-/-				P- value
TPM values	WT1	WT2	WT3	KO1	KO2	KO3		WT1	WT2	WT3	KO1	KO2	KO3
Day 0	0.997454	1.37537	1.22332	0.663744	1.03006	0.812355		-0.00110697	0.138421	0.087539	-0.177999	0.0128611	-0.0902543		0.0799011	not sig.
Day 7	0.877042	0.83375	0.829315	1.10965	1.52274	1.15289		-0.0569794	-0.0789643	-0.0812807	0.0451849	0.182627	0.0617889		0.0184653	Sig.
Day 25	2.41922	1.26454	1.2681	8.65954	8.52716	4.46268		0.383675	0.101934	0.103153	0.937495	0.930804	0.649595		0.00850926	Sig.
4- SOX11
	WT			CEP83-/-			log TPM	WT			CEP83-/-				P- value
TPM values	WT1	WT2	WT3	KO1	KO2	KO3		WT1	WT2	WT3	KO1	KO2	KO3
Day 0	57.2286	57.7792	59.394	61.2364	52.9964	61.6951		1.75761	1.76177	1.77374	1.78701	1.72425	1.79025		0.905174	not sig.
Day 7	36.9094	36.6554	39.3321	48.3509	37.1018	30.2058		1.56714	1.56414	1.59475	1.6844	1.56939	1.48009		0.967192	not sig.
Day 25	67.9793	90.6637	93.5435	157.796	260.7	182.548		1.83238	1.95743	1.97101	2.1981	2.41614	2.26138		0.00902544	Sig.
5- NAP1L3
	WT			CEP83-/-			log TPM	WT			CEP83-/-				P- value
TPM values	WT1	WT2	WT3	KO1	KO2	KO3		WT1	WT2	WT3	KO1	KO2	KO3
Day 0	19.9699	19.6389	22.3445	22.1665	20.2388	22.6434		1.30038	1.29312	1.34917	1.3457	1.30619	1.35494		0.406814	not sig.
Day 7	17.1713	16.9148	17.0602	16.9246	14.471	16.3036		1.2348	1.22827	1.23198	1.22852	1.1605	1.21228		0.203812	not sig.
Day 25	32.3069	18.5749	19.0757	52.4148	40.169	47.7478		1.50929	1.26893	1.28048	1.71945	1.60389	1.67895		0.0210481	Sig.
6- LMO2
	WT			CEP83-/-			log TPM	WT			CEP83-/-				P- value
TPM values	WT1	WT2	WT3	KO1	KO2	KO3		WT1	WT2	WT3	KO1	KO2	KO3
Day 0	0.840869	0.96063	0.707568	0.572294	0.478177	1.00813		-0.0752717	-0.0174439	-0.150232	-0.242381	-0.320411	0.00351826		0.371698	not sig.
Day 7	1.0834	1.23569	1.42904	1.75138	2.88319	1.67998		0.0347876	0.0919088	0.155043	0.243381	0.459873	0.225305		0.0601465	not sig.
Day 25	10.4132	6.08686	6.09194	11.1144	15.6465	24.008		1.01759	0.784393	0.784755	1.04589	1.19442	1.38036		0.049934	Sig.
7 - GATA2
	WT			CEP83-/-			log TPM	WT			CEP83-/-				P- value
TPM values	WT1	WT2	WT3	KO1	KO2	KO3		WT1	WT2	WT3	KO1	KO2	KO3
Day 0	2.74263	2.85085	3.26804	0.611773	0.692009	1.84432		0.438168	0.454974	0.514287	-0.21341	-0.159888	0.265835		0.030143	Sig.
Day 7	0.509978	0.941957	0.279792	0.484967	0.866665	1.20942		-0.292449	-0.0259689	-0.553165	-0.314288	-0.0621487	0.0825771		0.371122	not sig.
Day 25	2.35555	0.883837	0.538576	3.97732	11.593	4.65212		0.372092	-0.0536278	-0.268753	0.599591	1.06419	0.667651		0.0328555	Sig.
