# Supplementary material for: The centrosomal protein 83 (CEP83) regulates human pluripotent stem cell differentiation toward the kidney lineage
Source: eLife journal article supplement (doi:10.7554/elife.80165), 2022-10-12
Supplement: supp [file elife-80165-supp-v1.zip]

## Sheet: Sheet1
Figure 3- source data 2 (Bulk RNA seq)
Plotted data= TPM values
statistical test: ttest betweewn 3 WT and 3KO per each time point, P- value was calculated on log TPM values.
1- OSR1
	WT			CEP83-/-			log TPM	WT			CEP83-/-				P- value
TPM values	WT1	WT2	WT3	KO1	KO2	KO3		WT1	WT2	WT3	KO1	KO2	KO3
Day 0	0.068068	0.063441	0.08811	0.001	0.043991	0.001		-1.16706	-1.19763	-1.05497	-3	-1.35664	-3		0.0753142	not sig.
Day 7	15.9949	14.5796	18.1314	32.0247	28.2138	25.4539		1.20398	1.16375	1.25843	1.50548	1.45046	1.40575		0.00352605	Sig.
Day 25	9.52264	7.22454	7.06709	33.7619	51.4911	39.974		0.978757	0.858811	0.849241	1.52843	1.71173	1.60178		0.000444656	Sig.
2- FOXF1
	WT			CEP83-/-			log TPM	WT			CEP83-/-				P- value
TPM values	WT1	WT2	WT3	KO1	KO2	KO3		WT1	WT2	WT3	KO1	KO2	KO3
Day 0	0.034757	0.063855	0.099649	0.001	0.001	0.001		-1.45896	-1.19481	-1.00153	-3	-3	-3		0.000177393	Sig.
Day 7	161.239	166.762	154.837	285.35	275.402	242.546		2.20747	2.2221	2.18988	2.45538	2.43997	2.38479		0.000706085	Sig.
Day 25	0.111594	0.037117	0.103263	203.426	13.7159	9.32897		-0.952359	-1.43043	-0.986055	2.30841	1.13722	0.969834		0.00443035	Sig.
3- FOXF2
	WT			CEP83-/-			log TPM	WT			CEP83-/-				P- value
TPM values	WT1	WT2	WT3	KO1	KO2	KO3		WT1	WT2	WT3	KO1	KO2	KO3
Day 0	0.001	0.001	0.048171	0.097622	0.280361	0.480067		-3	-3	-1.31721	-1.01045	-0.552282	-0.318698		0.0385099	Sig.
Day 7	43.8725	46.8399	49.7061	111.628	87.9123	100.785		1.64219	1.67062	1.69641	2.04777	1.94405	2.0034		0.000632124	Sig.
Day 25	0.675259	0.26005	0.196598	221.425	17.3178	26.7632		-0.17053	-0.584943	-0.706421	2.34523	1.23849	1.42754		0.00467208	Sig.
4- FENDRR
	WT			CEP83-/-			log TPM	WT			CEP83-/-				P- value
TPM values	WT1	WT2	WT3	KO1	KO2	KO3		WT1	WT2	WT3	KO1	KO2	KO3
Day 0	0.001	0.001	0.001	0.018426	0.001	0.001		-3	-3	-3	-1.73457	-3	-3		0.373901	not sig.
Day 7	23.6575	23.5044	19.2498	30.0062	36.8441	40.1088		1.37397	1.37115	1.28443	1.47721	1.56637	1.60324		0.0123979	Sig.
Day 25	0.001	0.019688	0.001	29.2389	1.14512	0.870508		-3	-1.7058	-3	1.46596	0.0588506	-0.0602272		0.0094352	Sig.
5- HAND1
	WT			CEP83-/-			log TPM	WT			CEP83-/-				P- value
TPM values	WT1	WT2	WT3	KO1	KO2	KO3		WT1	WT2	WT3	KO1	KO2	KO3
Day 0	0.001	0.001	0.134046	0.001	0.001	0.001		-3	-3	-0.872746	-3	-3	-3		0.373901	not sig.
Day 7	594.694	624.537	534.765	765.19	733.031	676.644		2.77429	2.79556	2.72816	2.88377	2.86512	2.83036		0.0207648	Sig.
Day 25	20.137	7.01519	5.44885	525.646	82.0284	85.3351		1.304	0.846039	0.736305	2.72069	1.91396	1.93113		0.0181684	Sig.
5- HAND2
	WT			CEP83-/-			log TPM	WT			CEP83-/-				P- value
TPM values	WT1	WT2	WT3	KO1	KO2	KO3		WT1	WT2	WT3	KO1	KO2	KO3
Day 0	0.03396	0.031686	0.033107	0.001	0.001	0.03723		-1.46903	-1.49913	-1.48008	-3	-3	-1.42911		0.130646	not sig.
Day 7	20.6037	23.2545	16.4482	32.5706	51.6256	42.9041		1.31395	1.36651	1.21612	1.51283	1.71287	1.6325		0.0117369	Sig.
Day 25	6.15607	2.39896	2.39739	41.8529	279.202	212.963		0.789303	0.380023	0.379738	1.62173	2.44592	2.3283		0.00517076	Sig.
6- CXCL12
	WT			CEP83-/-			log TPM	WT			CEP83-/-				P- value
TPM values	WT1	WT2	WT3	KO1	KO2	KO3		WT1	WT2	WT3	KO1	KO2	KO3
Day 0	39.3947	41.5861	51.9211	54.442	48.6381	53.4798		1.59544	1.61895	1.71534	1.73593	1.68698	1.72819		0.136647	not sig.
Day 7	23.8897	22.5501	24.1103	128.011	123.442	103.784		1.37821	1.35315	1.3822	2.10725	2.09146	2.01613		1.87775e-05	Sig.
Day 25	87.4712	47.9577	51.358	593.009	254.702	340.186		1.94187	1.68086	1.71061	2.77306	2.40603	2.53172		0.00428068	Sig.
7- GATA5
	WT			CEP83-/-			log TPM	WT			CEP83-/-				P- value
TPM values	WT1	WT2	WT3	KO1	KO2	KO3		WT1	WT2	WT3	KO1	KO2	KO3
Day 0	6.81589	6.64375	6.28307	4.42713	4.44262	3.87224		0.833522	0.822413	0.798172	0.646122	0.647639	0.587962		0.0010149	Sig.
Day 7	14.0244	14.243	12.7985	33.7352	33.7348	24.7235		1.14689	1.1536	1.10716	1.52808	1.52808	1.39311		0.0018288	Sig.
Day 25	0.525459	5.82425	5.68188	4.20564	0.567787	0.512119		-0.279461	0.76524	0.754492	0.623832	-0.245815	-0.290629		0.447498	not sig.
7- GATA6
	WT			CEP83-/-			log TPM	WT			CEP83-/-				P- value
TPM values	WT1	WT2	WT3	KO1	KO2	KO3		WT1	WT2	WT3	KO1	KO2	KO3
Day 0	0.031086	0.001	0.030307	0.031015	0.029927	0.82778		-1.50744	-3	-1.51846	-1.50843	-1.52394	-0.0820851		0.231558	not sig.
Day 7	1.46899	1.76605	1.12642	4.40098	4.01965	3.18091		0.167019	0.247003	0.0516988	0.643549	0.604188	0.502551		0.00372299	Sig.
Day 25	2.78553	2.89802	3.28214	3.42943	15.3136	0.214953		0.444908	0.462102	0.516157	0.535221	1.18508	-0.667656		0.831268	not sig.
