# Supplementary material for: The centrosomal protein 83 (CEP83) regulates human pluripotent stem cell differentiation toward the kidney lineage
Source: eLife journal article supplement (doi:10.7554/elife.80165), 2022-10-12

**Fig. 1B:** Gel of PCR for CEP83 detection between WT hiPSCs versus Transfected hiPSCs with gRNAs.

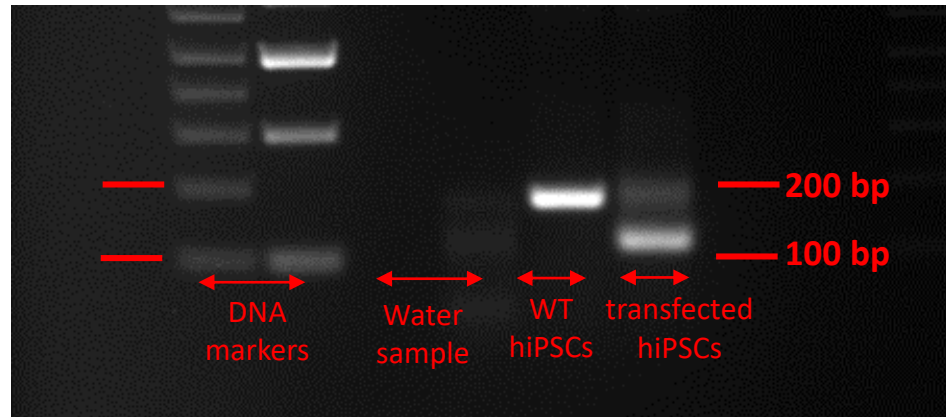

**Fig. 1C:** Gel of PCR for CEP83 expression in the selected *WT* and *KO* clones.

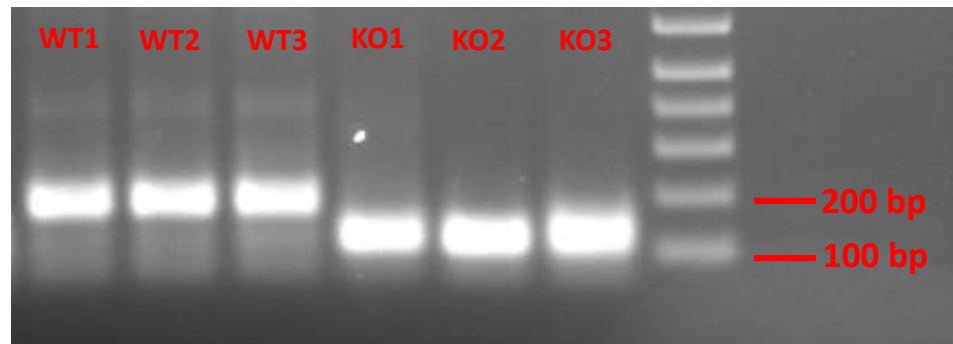

**Fig. 1E:** Western blot membrane for CEP83 protein detection in the selected *WT* and *KO* clones.

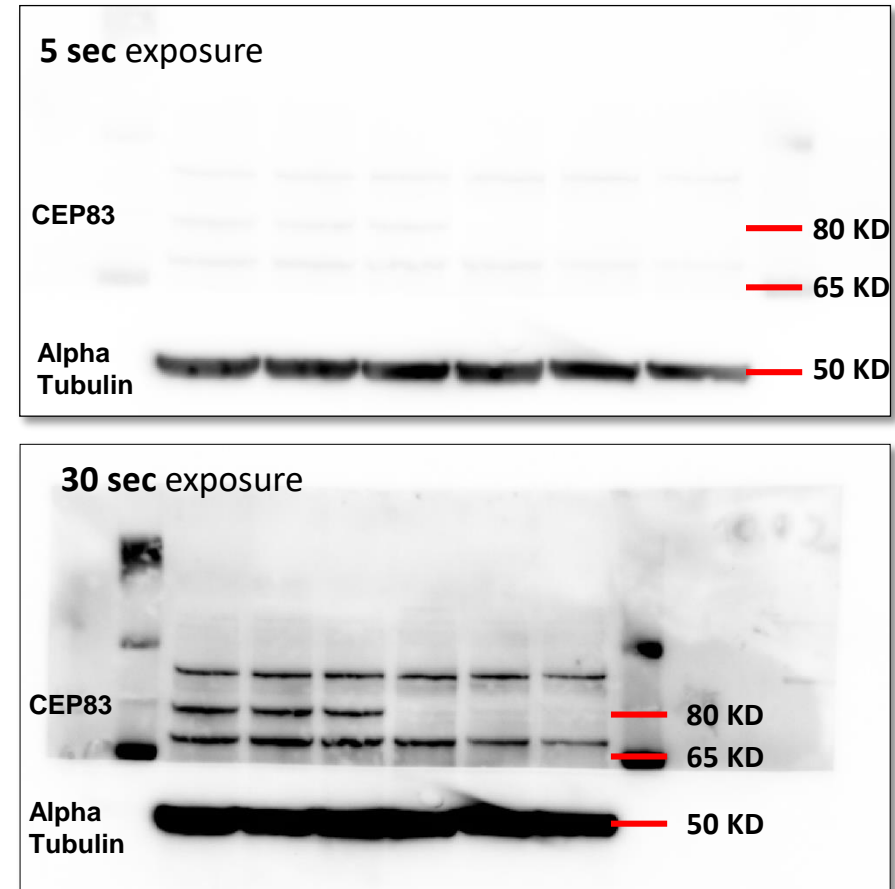

Supplement: supp [file elife-80165-supp-v1.zip]
